# Supplementary material for: The Conflicting Role of Caffeine Supplementation on Hyperoxia-Induced Injury on the Cerebellar Granular Cell Neurogenesis of Newborn Rats
Source: Oxid Med Cell Longev. 2022 May 31;2022:5769784. doi: 10.1155/2022/5769784 (PMC9175096; doi:10.1155/2022/5769784)
Supplement: Supplementary Materials — All basic data of the created diagrams are available in the following supplementary tables (Tables S1–S6). [file 5769784.f6.zip]

Archive with 6 entries (6 files):
- 5769784.f1.docx
- 5769784.f2.docx
- 5769784.f3.docx
- 5769784.f4.docx
- 5769784.f5.docx
- 5769784.f6.docx
