# Supplementary material for: The Conflicting Role of Caffeine Supplementation on Hyperoxia-Induced Injury on the Cerebellar Granular Cell Neurogenesis of Newborn Rats
Source: Oxid Med Cell Longev. 2022 May 31;2022:5769784. doi: 10.1155/2022/5769784 (PMC9175096; doi:10.1155/2022/5769784)
Supplement: Supplementary Materials — All basic data of the created diagrams are available in the following supplementary tables (Tables S1–S6). [file 5769784.f6.zip › 5769784.f5.docx]

**Table S-5** Quantitation of granule cell precursor- and granule cell-associated mRNA expression after oxygen-induced cerebellar neurotoxicity with/without caffeine

| **hyperoxia**  **caffeine** | **-**  **-** | **+**  **-** | **-**  **+** | **+**  **+** | **hyperoxia**  **caffeine** | **-**  **-** | **+**  **-** | **-**  **+** | **+**  **+** |
| --- | --- | --- | --- | --- | --- | --- | --- | --- | --- |
| **P3** | | | | | **P3_P15** | | | | |
| *Pax6*  *Chd7*  *NeuroD1*  *NeuN*  *Prox1* | 100±8.3  100±5.6  100±6.8  100±5.5  100±8.5 | **c**54±4.7  **d**56±4.5  **d**46±7.0  **d**55±2.7  87±6.6 | **b**63±8.6  **a**74±8.5  **c**55±8.1  84±7.3  **a**72±7.7 | **c**54±3.8  **d**54±4.6  **c**51±4.5  **c**65±4.1  **b**64±5.2 | *Pax6*  *Chd7*  *NeuroD1*  *NeuN*  *Prox1* | 100±4.7  100±9.0  100±5.7  100±9.7  100±5.6 | **b**63±8.6  76±9.0  **c**61±8.9  **c**45±6.8  91±7.0 | **b**60±7.0  96±6.3  **b**65±3.0  **b**54±8.0  85±6.4 | **e**94±7.8  86±13.3  78±4.9  **f**90±6.2  **a,g**131±7.8 |
| **P5** | | | | | **P5_P15** | | | | |
| *Pax6*  *Chd7*  *NeuroD1*  *NeuN*  *Prox1* | 100±2.9  100±5.0  100±6.0  100±7.7  100±3.8 | **b**50±8.6  **b**62±5.3  **c**40±8.2  **b**61±2.8  95±6.7 | **b**159±9.4  **b**145±11.2  107±8.9  **a**64±4.4  **c**73±1.6 | **a**61±9.0  **a**69±8.1  **c**47±10.0  **c**60±3.2  **b,e**61±7.1 | *Pax6*  *Chd7*  *NeuroD1*  *NeuN*  *Prox1* | 100±5.9  100±9.1  100±4.8  100±6.5  100±4.2 | 97±12.6  129±9.3  **b**132±4.8  **c**161±11.0  94±3.1 | 125±5.6  101±1.8  **d**179±7.4  **a**136±8.1  99±6.6 | 94±6.7  96±9.0  **f**102±3.5  **g**106±8.8  110±5.1 |

Data are normalized to the level of rat pups exposed to normoxia at each time point (control 100 %, white bars). Data expressed as % of control as mean ± SEM with n = 6-8/ group. a p < 0.05, b p < 0.01, c p < 0.001, d p < 0.0001 vs. control; ep < 0.05, fp < 0.01, gp < 0.001 vs. hyperoxia (ANOVA, Bonferroni's *post hoc* test; Kruskal-Wallis, Dunn´s *post hoc* test; Brown-Forsythe, Dunnett´s *post hoc* test).
